# Supplementary material for: MoS<sub>2</sub> Nanosheets Encapsulated in Carbon Nanofibers as Binder-free Anode for Superior Lithium Storage
Source: Preprints.org preprint supplement (doi:10.20944/preprints201612.0133.v1), 2016-12-28
Supplement: Supplementary file 1 [file supplementary]

## Supporting Information

### **MoS<sub>2</sub> Nanosheets Encapsulated in Carbon Nanofibers as Binder-free Anode for Superior Lithium Storage**

Yakai Deng<sup>a</sup>, Liang Zhan<sup>a\*</sup>, Yanli Wang<sup>a</sup> and Shubin Yang<sup>b\*</sup>

<sup>a</sup> State Key Laboratory of Chemical Engineering, East China University of Science and Technology, Shanghai 200237, China;

<sup>b</sup> Key Laboratory of Aerospace Advanced Materials and Performance of Ministry of Education, School of Materials Science and Engineering, Beihang University, Beijing 100191, China

\*Corresponding authors. Liang Zhan, E-mail: zhanliang@ecust.edu.cn; Shubin Yang, E-mail: yangshubin@buaa.edu.cn

**Figure S1.** SEM image of exfoliated MoS<sub>2</sub> nanosheets

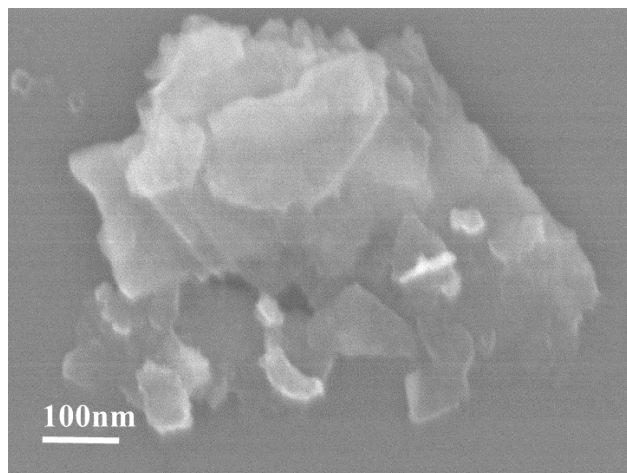

**Figure S2.** Exfoliated MoS<sub>2</sub> nanosheets dispersed in DMF solvent after ten days

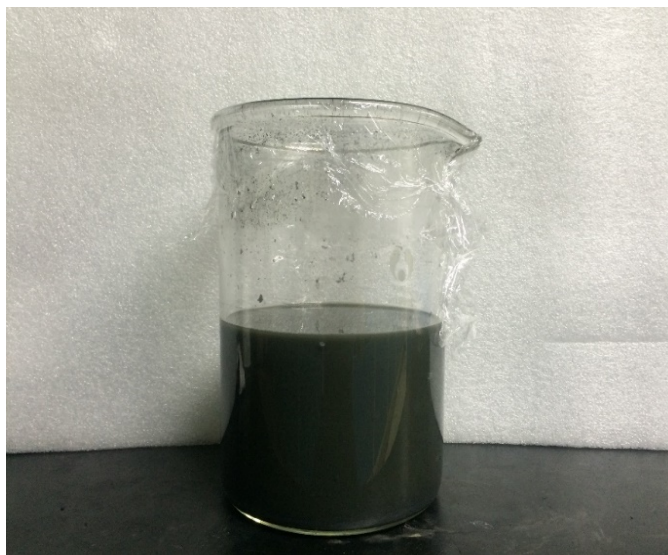

**Figure S3.** HRTEM image of exfoliated MoS<sub>2</sub> with a interplanar space of 0.63 nm

corresponding to its (002) plane

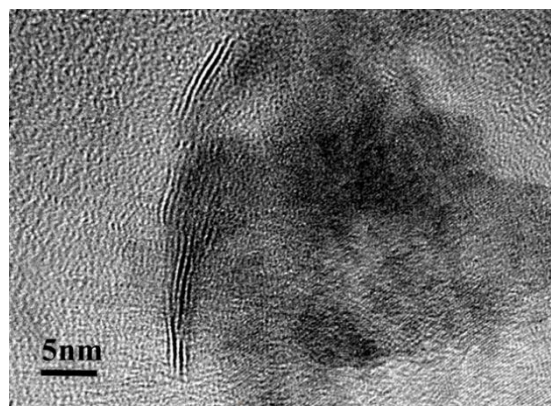

**Figure S4.** (a) MoS<sub>2</sub>/CNFs directly cut into tablet; (b) MoS<sub>2</sub>/CNFs film show good flexibility

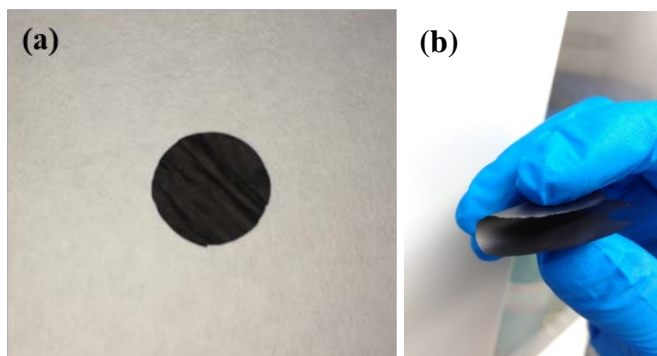

**Figure S5.** Cycling performance of the exfoliated MoS<sub>2</sub> nanosheets at a current density of

100 mA g<sup>-1</sup>

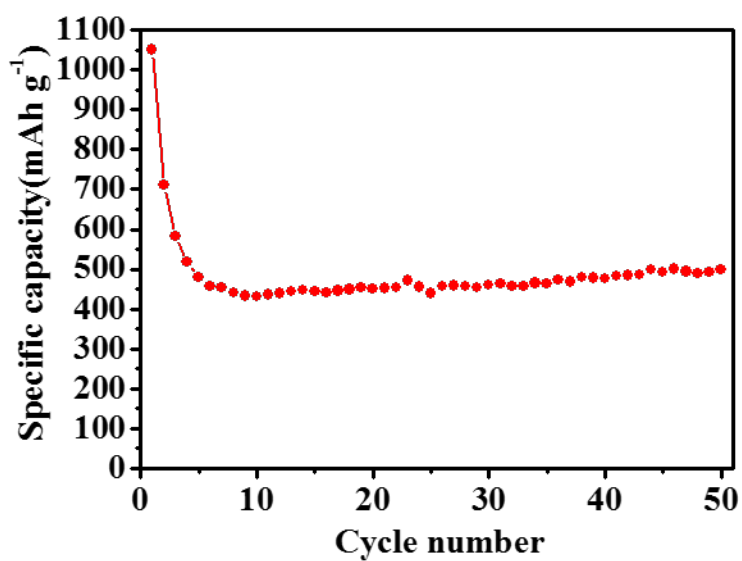

**Figure S6.** High-rate performance of the exfoliated MoS<sub>2</sub> nanosheets measured at different current densities.

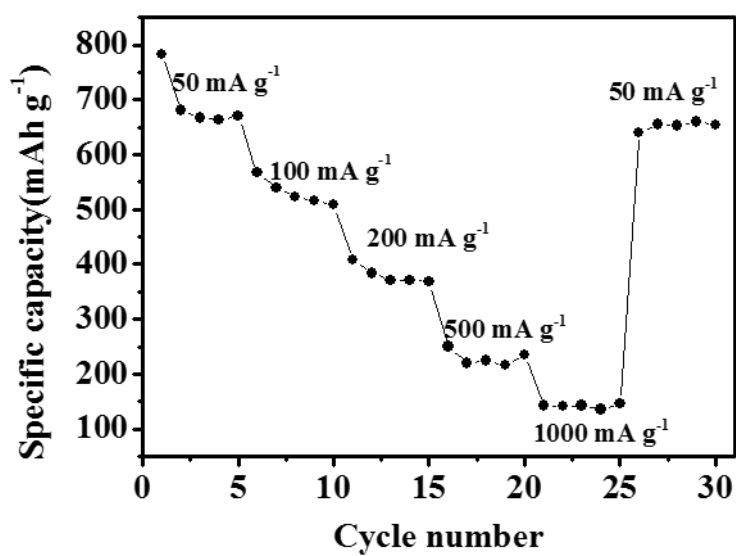

**Figure S7.** The equivalent circuit diagram of AC impedance for MoS<sub>2</sub>/CNFs, exfoliated

MoS<sub>2</sub> nanosheets and bulk MoS<sub>2</sub> samples

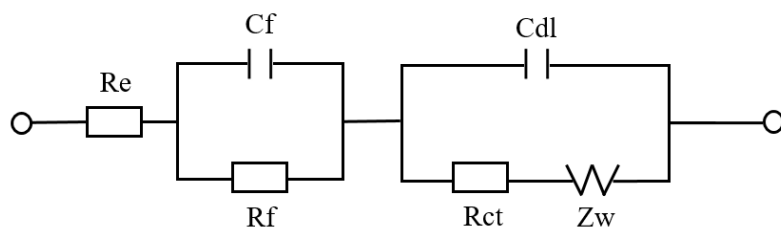

**Table S1.** Contents of molybdenum, sulfur, carbon and oxygen in the 1D MoS<sub>2</sub>/CNFs

| sample                 | Mo    | S      | C      | O      |
|------------------------|-------|--------|--------|--------|
| MoS <sub>2</sub> /CNFs | 21.4% | 11.16% | 51.89% | 16.42% |

**Table S2.** Simulation results of the kinetic parameters of MoS<sub>2</sub>/CNFs, exfoliated MoS<sub>2</sub> nanosheets and bulk MoS<sub>2</sub> electrodes

| Samples                     | $R_e (\Omega)$ | $R_f (\Omega)$ | $R_{ct} (\Omega)$ |
|-----------------------------|----------------|----------------|-------------------|
| MoS <sub>2</sub> /CNFs      | 3.18           | 4.07           | 13.65             |
| Exfoliated MoS <sub>2</sub> | 3.51           | 14.33          | 83.77             |
| Bulk MoS <sub>2</sub>       | 4.33           | 16.24          | 228.3             |
